# Supplementary material for: The Androgen Hormone-Induced Increase in Androgen Receptor Protein Expression Is Caused by the Autoinduction of the Androgen Receptor Translational Activity
Source: MDPI journal article supplement (doi:10.3390/cimb44020041), 2022-01-25

Figure S1: Representative Picture of eosAR experiments Part 1

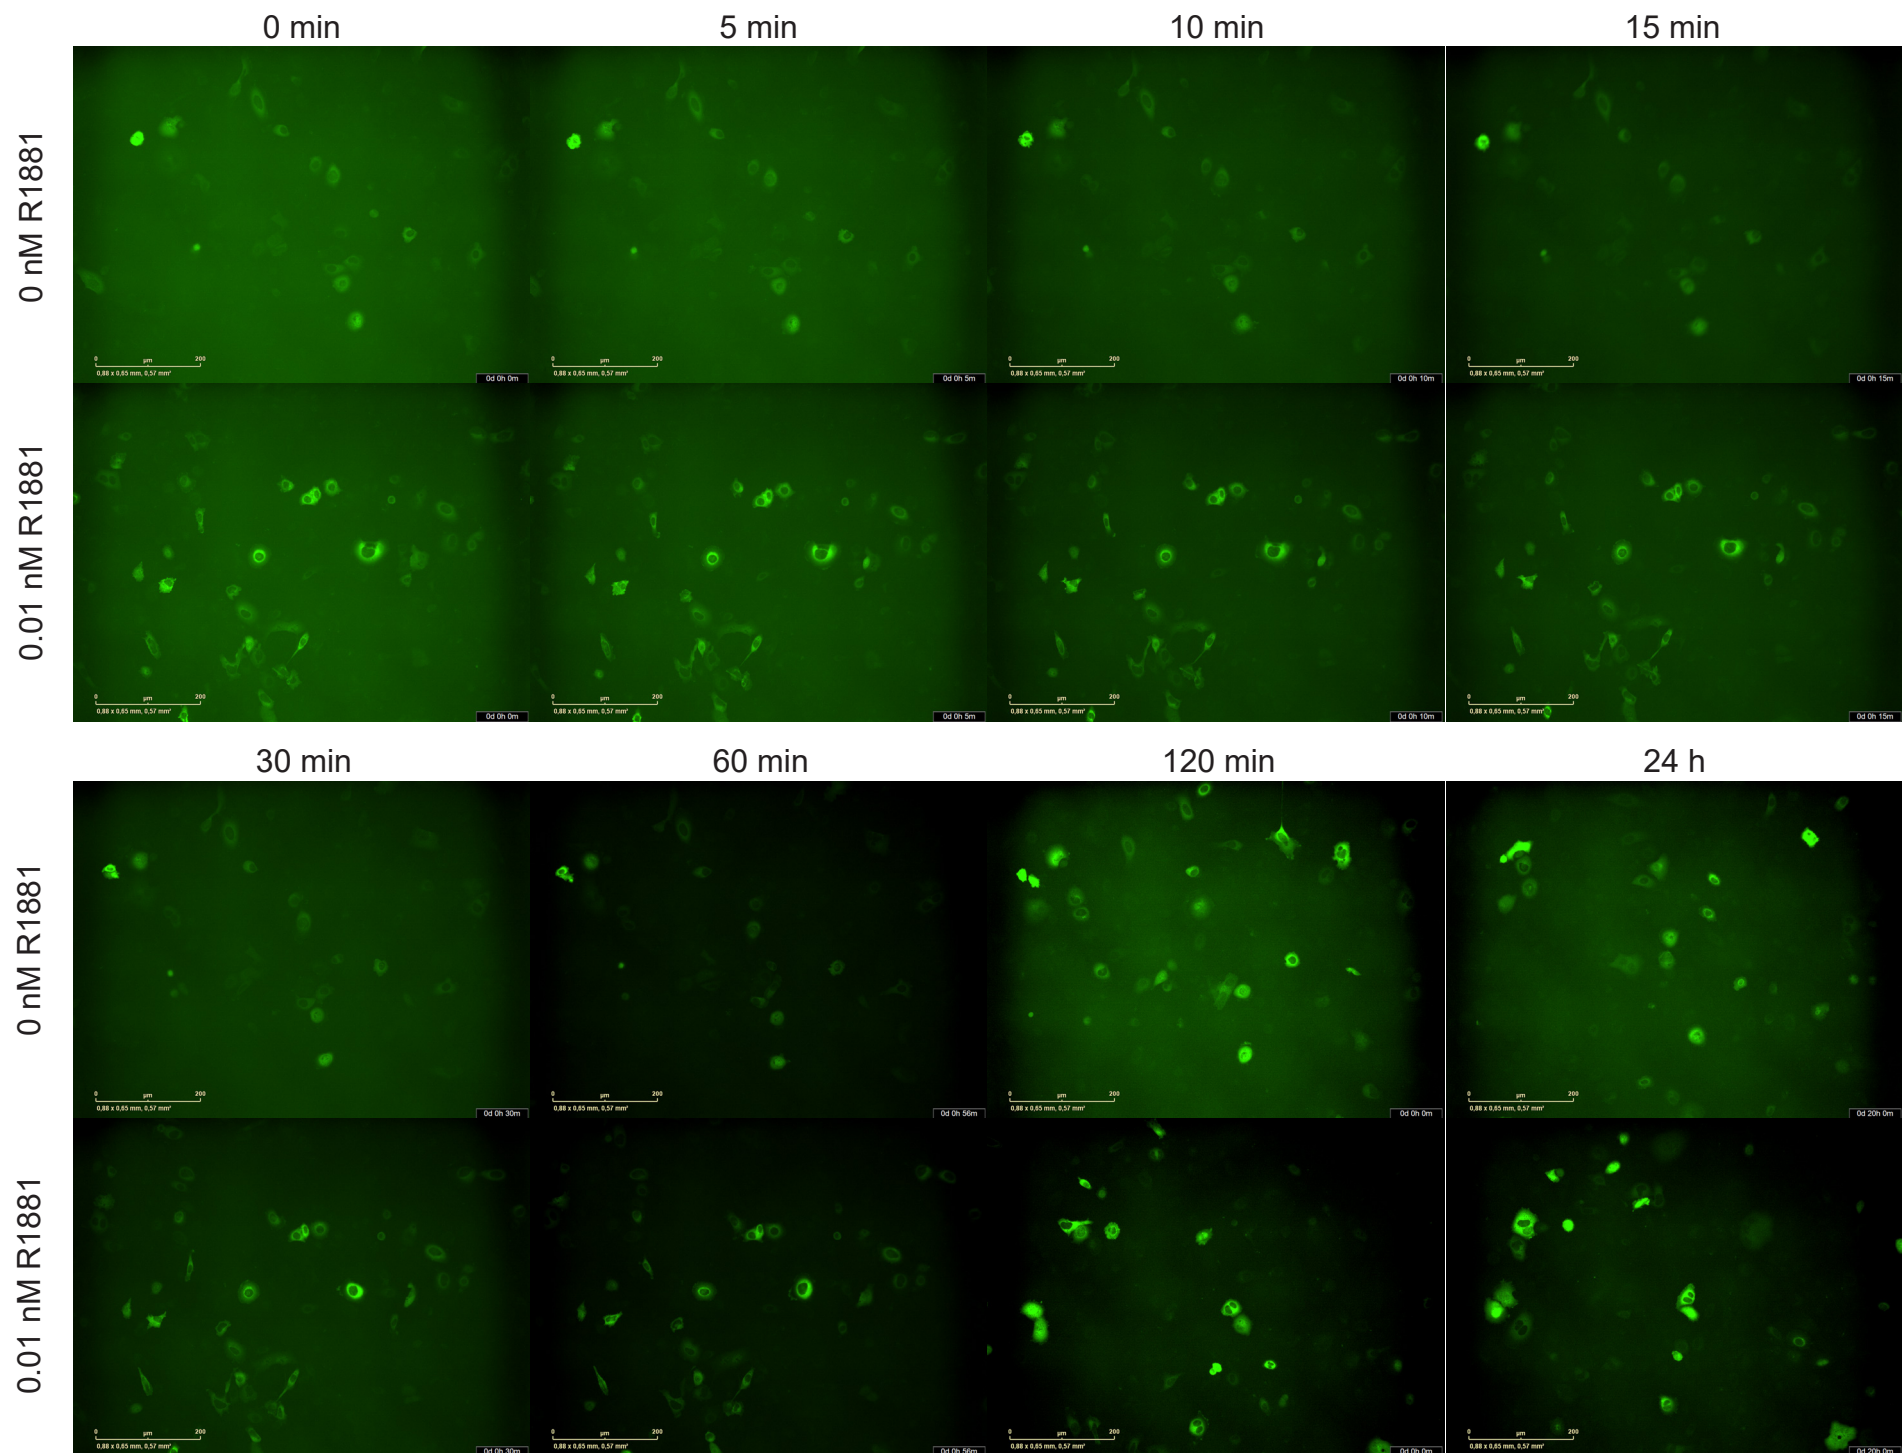

Figure S2: Representative Picture of eosAR experiments Part 2

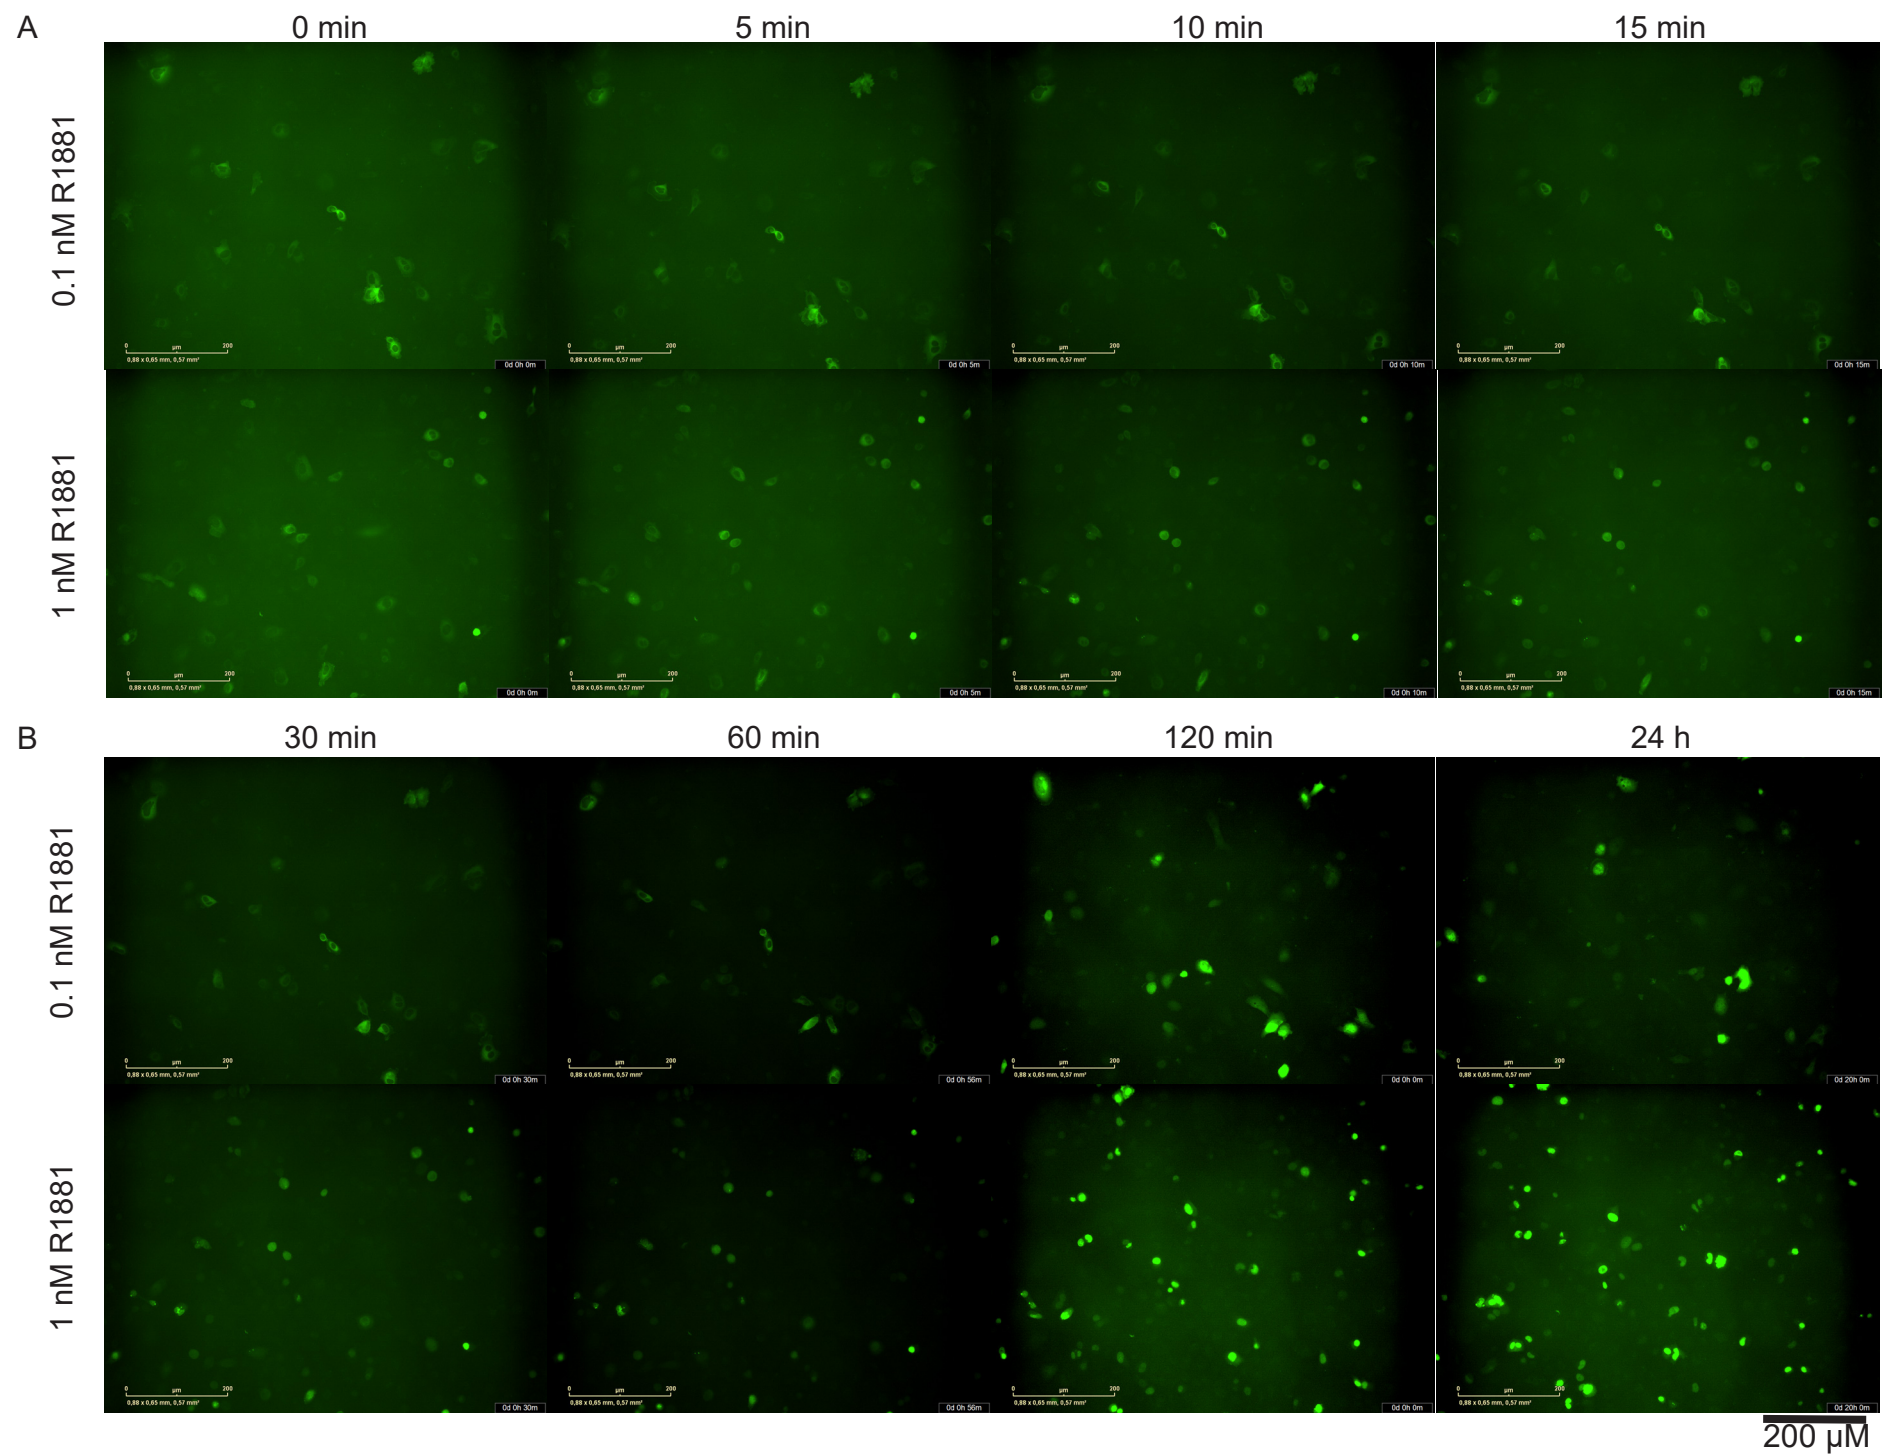



Figure S3: : (A) Representative Picture of eosAR experiments Part 3 (B) Evaluation of the eosAR experiments (C) Specify controls of Immunofluorescence

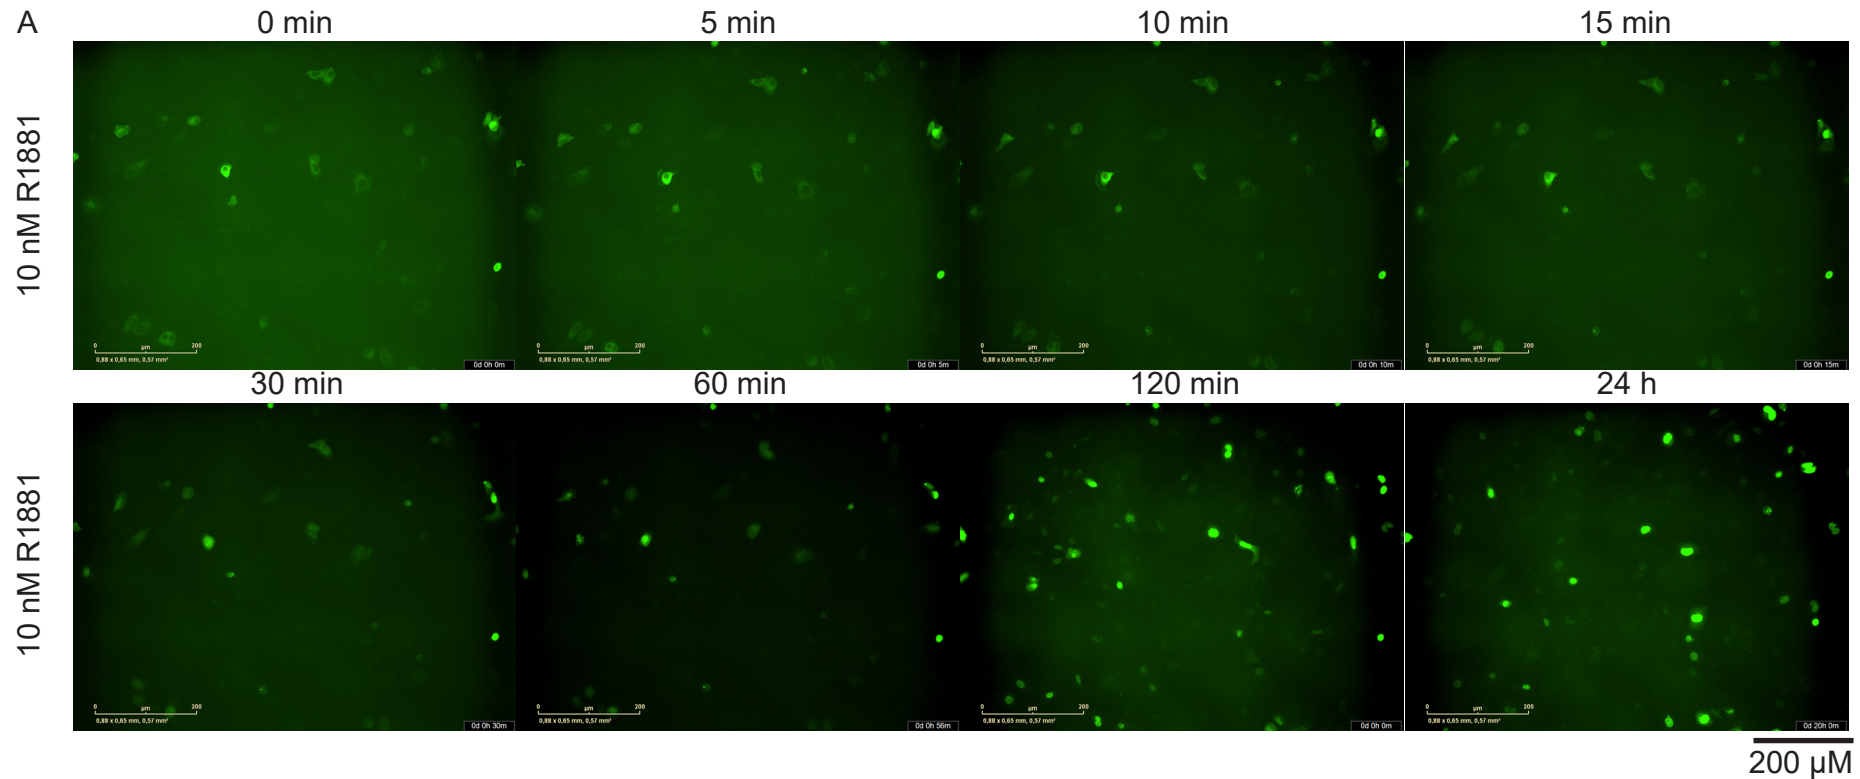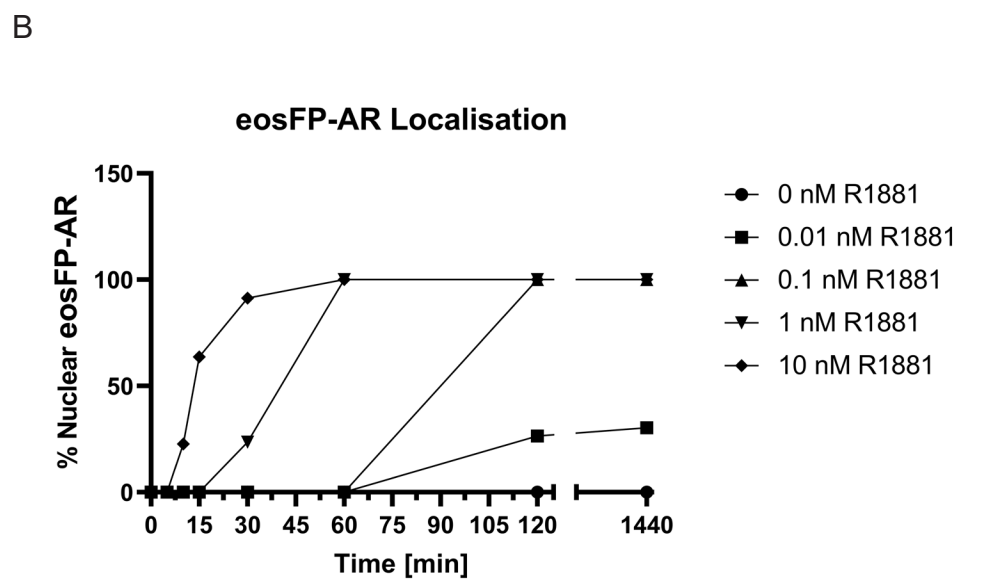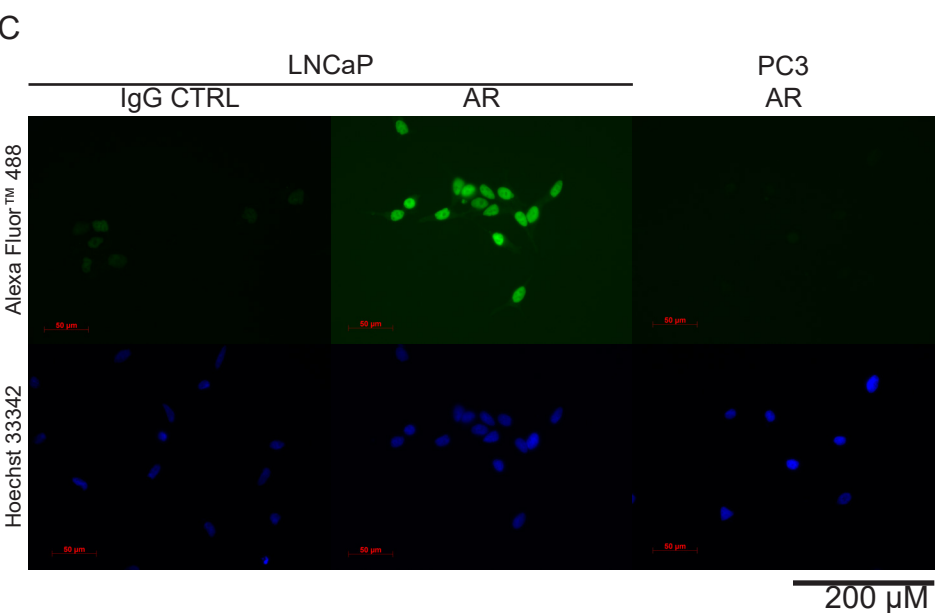

Figure S4: Uncropped Western blots of Figure 4

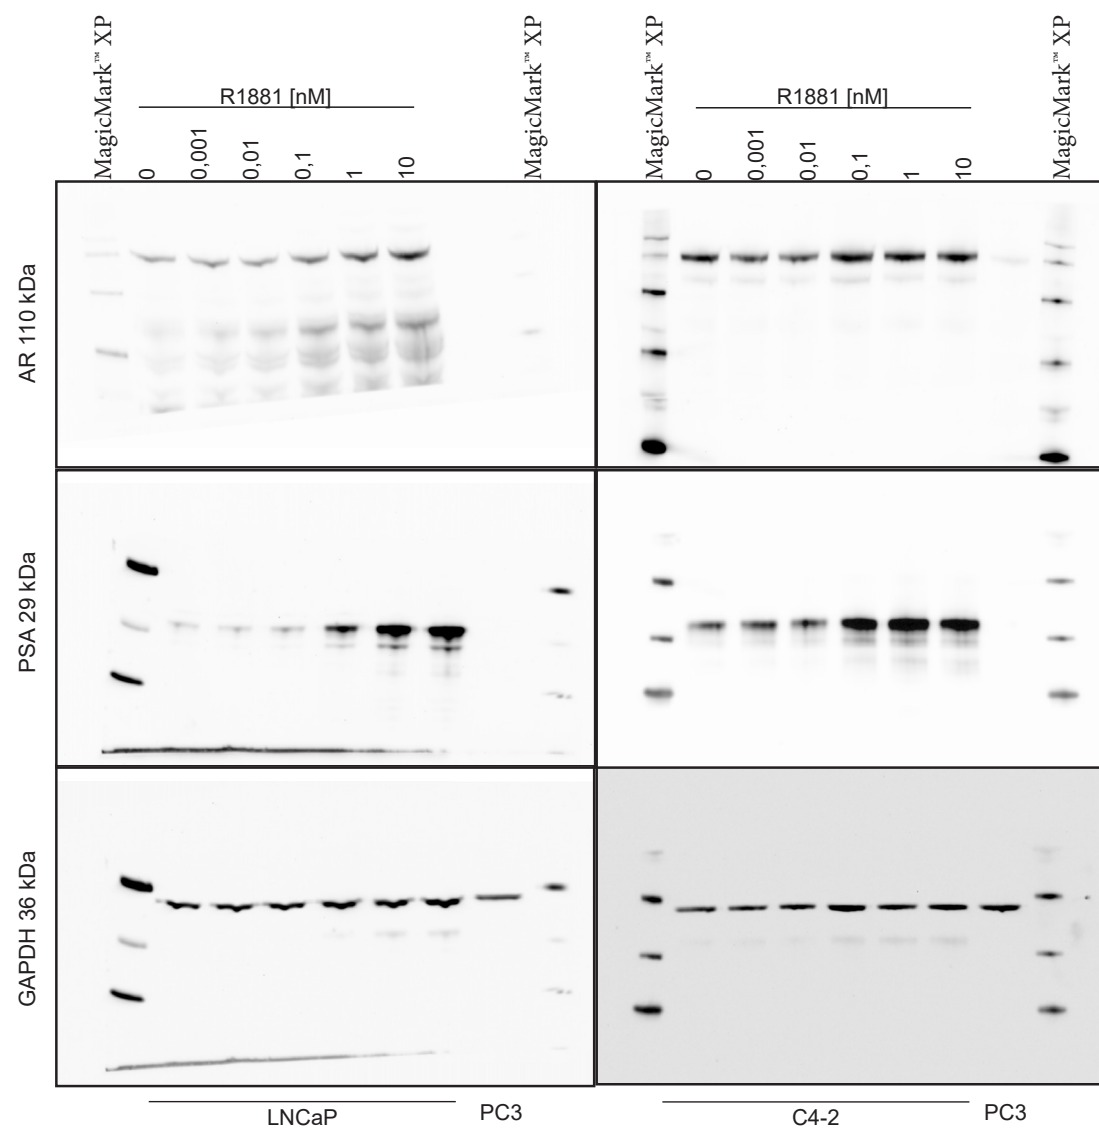

Figure S5: Uncropped Western blots of Figure 5

A

Time series of the relative AR expression  
after exposure to 1nM R1881

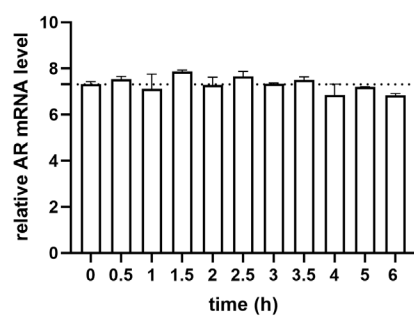

B

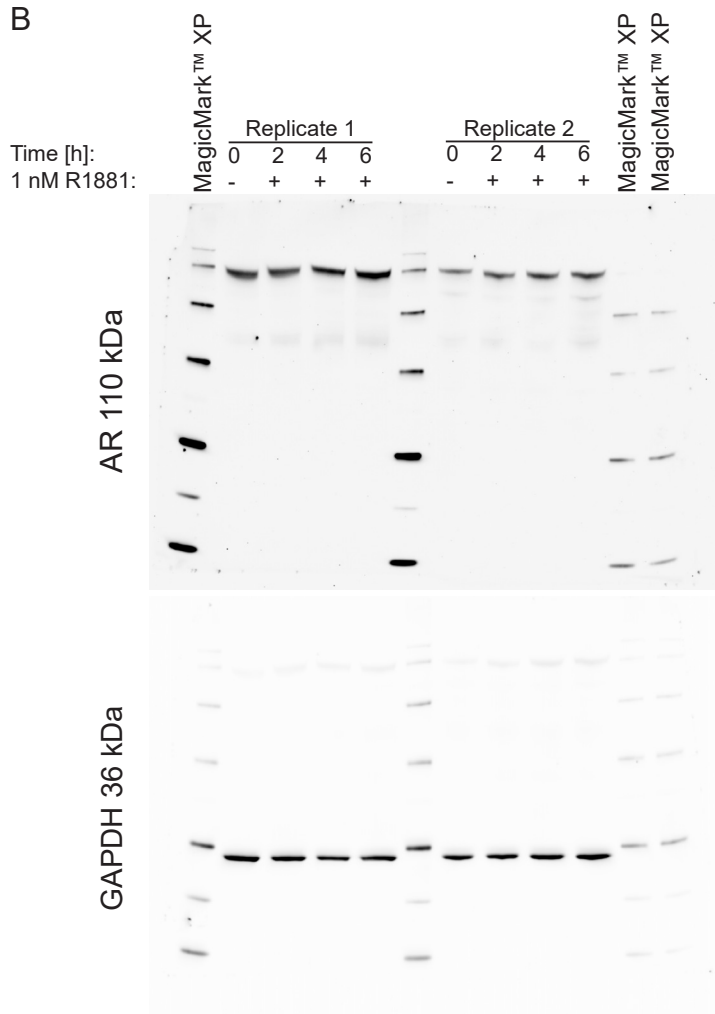

C

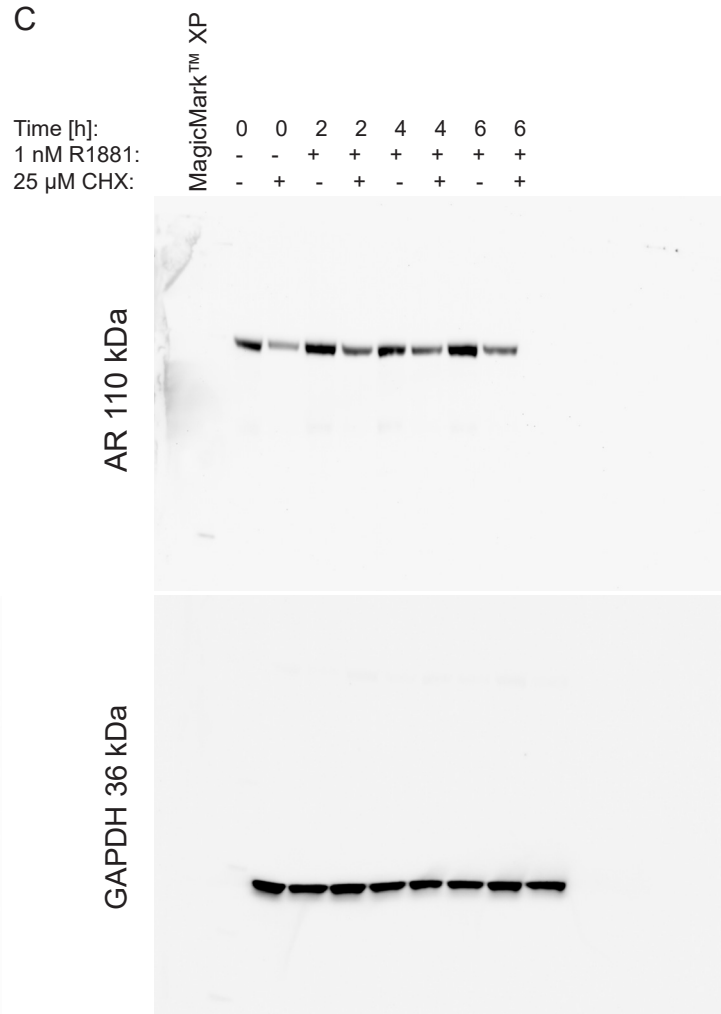

Supplement: s1 [file s1]
